# Supplementary material for: Intratumoral aluminum hydroxide–anchored IL-12 drives potent antitumor activity by remodeling the tumor microenvironment
Source: JCI journal article supplement (doi:10.1172/jci.insight.168224), 2023-12-07
Supplement: sd1 [file 1]

## Supplementary Materials for

### **Intratumoral aluminum hydroxide-anchored IL-12 drives potent anti-tumor activity by remodeling the tumor microenvironment**

Sailaja Battula<sup>1\*</sup>, Gregory Papastoitsis<sup>1</sup>, Howard L. Kaufman<sup>1</sup>, K. Dane Wittrup<sup>2</sup>, Michael M. Schmidt<sup>1</sup>

\*Corresponding author. Email: [sbattula@ankyratx.com](mailto:sbattula@ankyratx.com)

Contents:

Materials and Methods

Fig. S1. Alhydrogel<sup>®</sup> retention and activity of optimized mouse IL-12-ABP proteins

Fig. S2. Tumor retention and tissue biodistribution of <sup>125</sup>I labeled mANK-101

Fig. S3. IV clearance and heparin binding of IL-12-ABP and IL-12 proteins

Fig. S4. Alum does not have therapeutic or immunologic activity

Fig. S5. Nanostring analysis of mANK-101 induced tumor changes

Fig. S6. Changes in overall cell populations after mANK-101 treatment by scRNA-seq

Fig. S7. mANK-101 combination activity with CTLA-4 blockade

Fig. S8. T cell subclustering by scRNA-seq

Table S1. Retention time and conductivity of IL-12 or IL-12-ABP proteins from Heparin HP HiTrap column during gradient from 0 to 1.5 M NaCl in 50 mM HEPES, pH 7.4.

Table S2. Serum cytokines from cynomolgus macaques treated with ANK-101

Table S3. SPECT/CT acquisition and reconstruction parameters

Table S4. FACS antibody reagents

Table S5. Genes used in Nanostring cell signatures

Table S6. Hematology parameters measured in cynomolgus macaque study

Table S7. Clinical chemistry parameters measured in cynomolgus macaque study

## **Supplementary Materials and Methods**

### **Cloning**

Codon optimized DNA sequences were synthesized at ATUM Bio (Newark, CA). Human Fam20C (Uniprot Q8IXL6) was cloned into the PD2610-v10 transient transfection vector with its native signal peptide and a linker-KDEL sequence (GGGSKDEL) for intracellular retention fused at the c-terminus. Single-chain human IL-12 constructs were cloned with a human IL2 signal peptide and mature human IL-12B/p40 (Uniprot P29460) fused to mature human IL-12A/p35 (Uniprot P29459) through a (G<sub>4</sub>S)<sub>3</sub> linker. Single-chain mouse IL-12 constructs were cloned with a human IL2 signal peptide and mature mouse IL-12B/p40 (Uniprot P43432) fused to mouse IL-12A/p35 (Uniprot P43431) through a (G<sub>4</sub>S)<sub>3</sub> linker. For constructs containing an alum binding peptide (ABP), IL-12 sequences were fused at the C-terminus to DNA encoding a linker GGGGEGGGG followed by 8 repeats of the sequence SEEGGGG. Constructs for human IL-12, mouse IL-12, and mouse IL-12-ABP were further appended with a c-terminal His-6 tag and cloned into a pD2610-v10 vector for transient transfection. The human IL-12-ABP gene was cloned without the c-terminal His-tag, instead ending in a single serine residue. Human IL-12-ABP and Fam20C-KDEL constructs were cloned into a single ATUM Leap-In-Transposase vector with two expression cassettes with different promoters selected to express the hIL-12-ABP polypeptide at an 8-fold higher level than Fam20C-KDEL.

### **Protein expression and purification**

Plasmids encoding human IL-12, mouse IL-12, or mouse IL-12-ABP were transiently transfected in suspension HEK-293 cells either with or without co-transfection with the human Fam20C-KDEL plasmid. In most co-transfections, a 4:1 mass ratio of IL-12 plasmid to Fam20C-KDEL plasmid was used. Supernatants were harvested and IL-12 fusion polypeptides purified by affinity chromatography on NiSepharose Excel (Cytiva 17-3712-02). Eluted fusion polypeptides were formulated in Tris-buffered saline (TBS), pH 7.4 and purity determined on a Perkin Elmer GXII capillary electrophoresis system. Polypeptide aggregation was assessed by HPLC-SEC with a 300Å pore size. Where needed, proteins were further purified by FPLC-SEC on a HiLoad 16/600 or 26/600 Superdex 200 pg column (Cytiva 28-9893-36) and monomeric peak fractions were pooled. IL-12-ABP polypeptides were further polished by anion exchange chromatography to enrich for highly phosphorylated species. Fusion polypeptides in TBS were

diluted 3-fold in WFI and loaded on a HiTrap Q Sepharose column. Samples were washed with 1% Tx-13 in 0.33x TBS followed by 15 column volumes of 20 mM Tris, pH 8.1 then eluted with a linear gradient from 20 mM Tris, pH 8.1 to 20 mM Tris, pH 8.1 + 600 mM NaCl over 20 column volumes. Selected fractions were pooled and buffer exchanged into TBS. Human IL-12-ABP proteins were stably transfected in CHO cells using the ATUM Leap-In-Transposase system and stable pools selected. After 14-day expression in a fed-batch culture, supernatants were harvested and purified by multiple chromatography steps.

### **HEK-Blue-IL-12 reporter assay**

*In vitro* IL-12 signaling activity was assessed using the HEK-Blue-IL-12 reporter assay (Invivogen hkb-il12) according to manufacturer's instructions. This cell line is derived from HEK293 cells stably transfected with human IL-12R $\beta$ 1 and hIL-12R $\beta$ 2 and a secreted alkaline phosphatase (SEAP) reporter under the control of a STAT4 inducible promoter. Since mouse IL-12 cross-reacts with the human IL-12 receptors, this cell line can be used to assess potency of both human and mouse IL-12 derived constructs. HEK-Blue-IL-12 cells were cultured in DMEM + 4.5 g/L glucose, 2 mM L-glutamine, 10% heat inactivated FBS, Pen-Strep (100 U/mL) and 100  $\mu$ g/mL Normocin and passaged at 70-80% confluency. For potency testing, the same media was used without Normocin.

Human or mouse IL-12-ABP proteins in TBS were mixed with Alhydrogel<sup>®</sup> to a final concentration of 200  $\mu$ g/mL fusion polypeptide and 2 mg/mL aluminum hydroxide, then incubated at RT for 30 minutes. Mixtures were diluted in elution buffer containing a final concentration 1 mM phosphate and 20% serum and incubated at 37°C with rotating for 24 hours. Samples were centrifuged at 18,000xg at 4°C for 10 minutes to pellet alum and the supernatant carefully removed and saved. Pellets were resuspended in an equal volume of elution buffer. Samples were diluted in assay media to generate a titration series with a top concentration of 10  $\mu$ g/mL and 3x dilutions. 20  $\mu$ L of each sample in the titration series was transferred to a 96 well plate and mixed with 180  $\mu$ L of HEK-Blue-IL-12 cell suspension (280,000 cells/mL) for a final top fusion polypeptide concentration of 1  $\mu$ g/mL and 50,000 cells/well. Plates were then incubated overnight at 37°C in 5% CO<sub>2</sub>. The next day, 20  $\mu$ L of supernatant from each well was transferred to a new plate and mixed with 180  $\mu$ L of QUANTI-Blue solution (Invivogen rep-

qbs), a colorimetric reagent that turns blue in the presence of secreted alkaline phosphatase. Plates were incubated for at 37°C for 3 hours, then absorbance measured at 620-655 nm.

### **<sup>125</sup>I protein labeling**

2 µL of Na <sup>125</sup>I (Perkin Elmer) in 0.1 M NaOH was added to a sterile 1.5 mL Axygen vial. In order, 50 µL of 3% acetic acid in methanol, 10 µL of 2.5 mg/mL N-Succinimidyl-3-(tri-n-butylstannyl) benzoate (ATE) in methanol, and 10 µL of 2.0 mg/mL N-Chlorosuccinimide (NCS) in methanol were added to the vial to form N-succinimidyl-3-[<sup>125</sup>I]iodobenzoate (<sup>125</sup>I-SIB). The reaction was allowed to proceed at room temperature for 5 minutes then quenched with 15 µL of 2.0 mg/mL sodium bisulfate. Reaction mixtures were loaded on a Waters 500 mg silica sep-pak cartridge pre-conditioned with 3 mL of n-hexane. Vials were rinsed with 50 µL of 80/20 n-hexane/ethyl acetate and rinse added to the packing bed. The sep-pak column was eluted with 6 mL of 80/20 n-hexane/ethyl acetate and 500 µL fractions collected. Fractions with the highest activity were pooled and concentrated to dryness in a 1.5 mL Axygen vial at 60°C under a stream of argon.

mIL-12-ABP was buffer exchanged into 0.2 M phosphate buffer, pH 7.5 using a 20 K Slide-A-Lyzer dialysis device. 119 µg of mIL-12-ABP in 50 µL was mixed with the <sup>125</sup>I-SIB reagent resuspended in 150 µL of 200 mM phosphate buffer, pH 7.5. The reaction was incubated in an Eppendorf Thermomixer C at 37°C and 300 RPM. After 60 minutes, samples were transferred to a 10K Amicon centrifuge filter and washed five times with 40 mM Tris-HCl, 150 mM sodium chloride, pH 7.5 with concentration at 10,000 rcf for 5 minutes. The final specific activity of the <sup>125</sup>I-conjugated mIL-12-ABP was 9.0 µCi/µg with a radio concentration of 7.1 µCi/µL. Cold mIL-12-ABP test article was added to the sample to adjust the specific activity concentration to 5.0 µCi/µg.

### **SPECT/CT image analysis**

SPECT and CT images were acquired using acquisition and reconstruction parameters described in **Table S3**. Reconstructed images were generated in units of activity with values assigned to the voxels comprising the 3D reconstructed SPECT images in units of µCi.

Reconstructed images were co-registered to one another, resampled to 0.2 mm<sup>3</sup> voxels, and cropped to a uniform size prior to analysis. Whole body region of interest (ROI) was generated by CT-based thresholding with manual alterations. Thyroid ROI was defined by placing a single fixed volume sphere to the respective organ in each image. Liver ROI was defined by placing two fixed volume spheres in the anatomical area as defined by the CT. Kidney ROI was defined by placing phantom organs over the kidneys. Bladder ROI was defined by thresholding to encompass all activity in the area. In cases where there was no activity, one fixed volume sphere was placed in the corresponding anatomical location. The tumor ROI was manually generated based on the tumor boundaries visualized on the CT.

Results were presented in units of percent injected dose (%ID) or percent injected dose per gram (%ID/g). The %ID for each analyzed region from the *in vivo* imaging data or *ex vivo* gamma count data can be defined as  $\%ID = \text{Uptake} / \text{Injected Dose} * 100$  where Uptake = radioactivity (μCi) in a particular ROI or gamma counting sample, decay corrected to the time of injection and Injected Dose = radioactivity (μCi) injected into the subject. The %ID/g for each analyzed region from the *in vivo* imaging data or *ex vivo* gamma count data can be defined as  $\%ID / \text{ROI\_weight}$  where ROI\_weight for imaging based data is calculated as the volume of the particular ROI in mL assuming a tissue density of 1 g/mL and for *ex vivo* gamma count data is the sample weight of the tissue.

### **Mouse splenocyte potency assay**

Spleens were isolated from C57BL/6 mice and kept in RPMI 1640 media. To isolate splenocytes, spleens were gently mashed through a 70 μm strainer using the plunger of a 5 mL sterile syringe then washed with 5 mL RPMI 1640 media. Cells were pelleted and resuspended in 1 mL red blood cell (ACK) lysing buffer for 2 min at RT, washed multiple times, and resuspended in complete media (RPMI 1640 with 10% FBS, 1% P/S and 55 μM β-ME). Splenocytes were plated in 96 well round bottom plates at a density of 5x10<sup>5</sup> cells per well and stimulated 100 ng/mL anti-CD3 (clone 145-2C11) in the presence of vehicle or a titration of free mIL-12-ABP or mANK-101 complex. Following a 72-hour incubation, cell culture supernatants were harvested and analyzed for IFNγ using a Mouse IFN-γ Immunoassay Quantikine ELISA Kit (R&D Systems).

### **Heparin binding assay**

Human or mouse IL-12 or IL-12-ABP proteins in 50 mM HEPES, pH 7.4 were loaded onto a 1 mL Heparin HP HiTrap column at a 0.5 mL/min flow rate. Bound protein was eluted with a gradient from equilibration buffer A (50 mM HEPES, pH 7.4) to elution buffer B (50 mM HEPES, pH 7.4 + 1.5 M NaCl) over 20 minutes.

### **Cynomolgus macaque toxicology study**

Naïve cynomolgus macaques, age 2.5 – 5 years, were administered a single subcutaneous administration of 0.2, 2, or 20 µg/kg ANK-101 on day 1 or two repeat administrations of 2 or 20 µg/kg ANK-101 on days 1 and 8 with two animals (1/sex) per group. Clinical observations, injection site observations, body weights, and body temperatures were recorded. For coagulation measurements, blood samples were collected with sodium citrate anticoagulant pre-dose and days 2 and 8 for the single-dose groups or pre-dose and day 15 for the repeat dose groups. Prothrombin time (PT) and activated partial thromboplastin time (APTT) were measured by solidification method using a Sysmex coagulation analyzer. For hematology, blood was collected with EDTA-K<sub>2</sub> anticoagulant pre-dose and on days 2 and 8 for the single-dose groups and pre-dose and days 2, 7, 9, and 15 for the repeat dose groups. Samples were run on an ADVIA 2120 hematology system with detected parameters listed in Supplemental **Table 5**. For clinical chemistry, serum was prepared from blood samples taken pre-dose and on days 2 and 8 for the single-dose groups and pre-dose and days 2, 7, 9, and 15 for the repeat dose groups and analyzed on a TBA-120FR clinical chemistry analyzer for parameters listed in Supplemental **Table 6**. For systemic cytokine measurements, serum was prepared from blood samples drawn at pre-dose, 2 hours, 1 day, or 3 days after each dose, and on day 8 or 15 for the single or repeat dose groups respectively and analyzed by MSD using kit K15068L to quantify IL-2, IL-6, IL-10, TNF-α, IL-1β, IL-12p70, IFN-γ, and CXCL10.

### **Study Approval**

All procedures involving the care and use of animals in this study were performed according to the guidelines approved by Institutional Animal Care and Use Committee (IACUC) at JOINN LABORATORIES (Suzhou) Inc. Animal care was compliant with the SOPs of JOINN

LABORATORIES (Suzhou) Inc., the Guide for the Care and Use of Laboratory Animals (8th Edition, Institute of Laboratory Animal Resources, Commission on Life Sciences, National Research Council; National Academy Press; Washington, D.C., 2011), and the U.S. Department of Agriculture through the Animal Welfare Act (Public Law 99-198). JOINN LABORATORIES (Suzhou) Inc. is fully accredited by the Association for Assessment and Accreditation of Laboratory Animal Care International (AAALAC).

Supplemental Figure 1

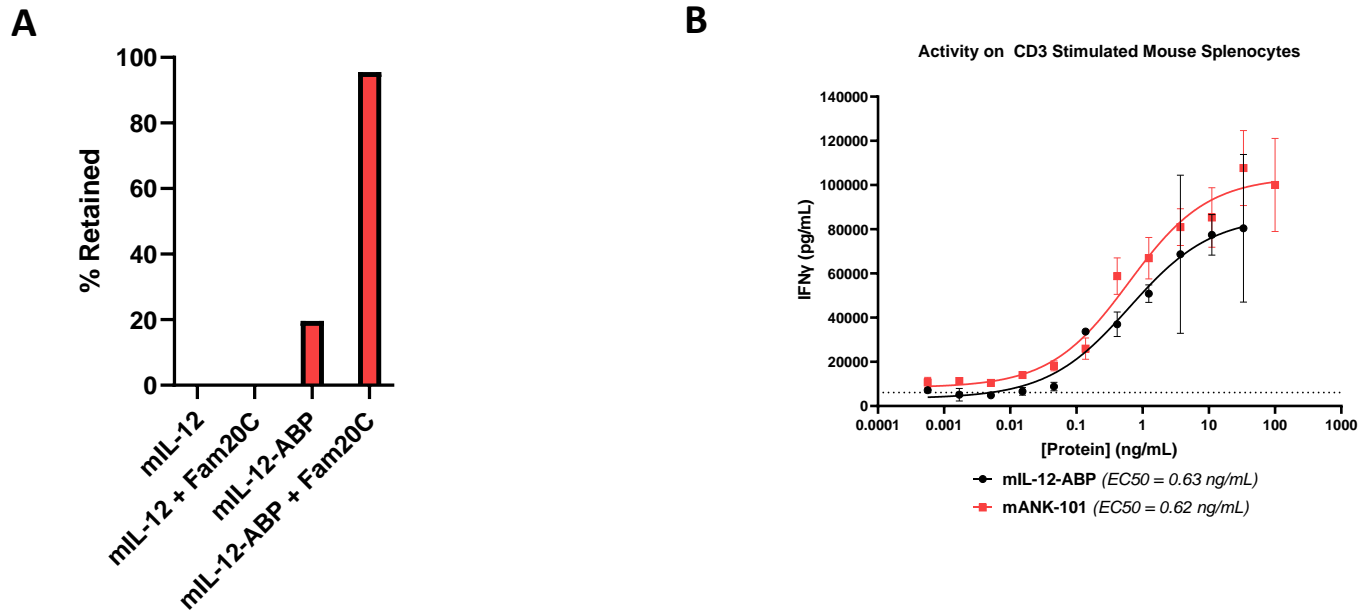

**Supplemental Figure 1. Alhydrogel® retention and activity of optimized mouse IL-12-ABP proteins. (A)** Percent of Alhydrogel® complexed IL-12-ABP remaining bound during incubation in Tris-buffered saline (TBS) with 20% serum as measured by free protein detected in supernatant by ELISA. **(B)** IFN $\gamma$  production measured by ELISA from activated murine splenocytes following incubation with a titration of free mL-12-ABP protein or mANK-101 complex.



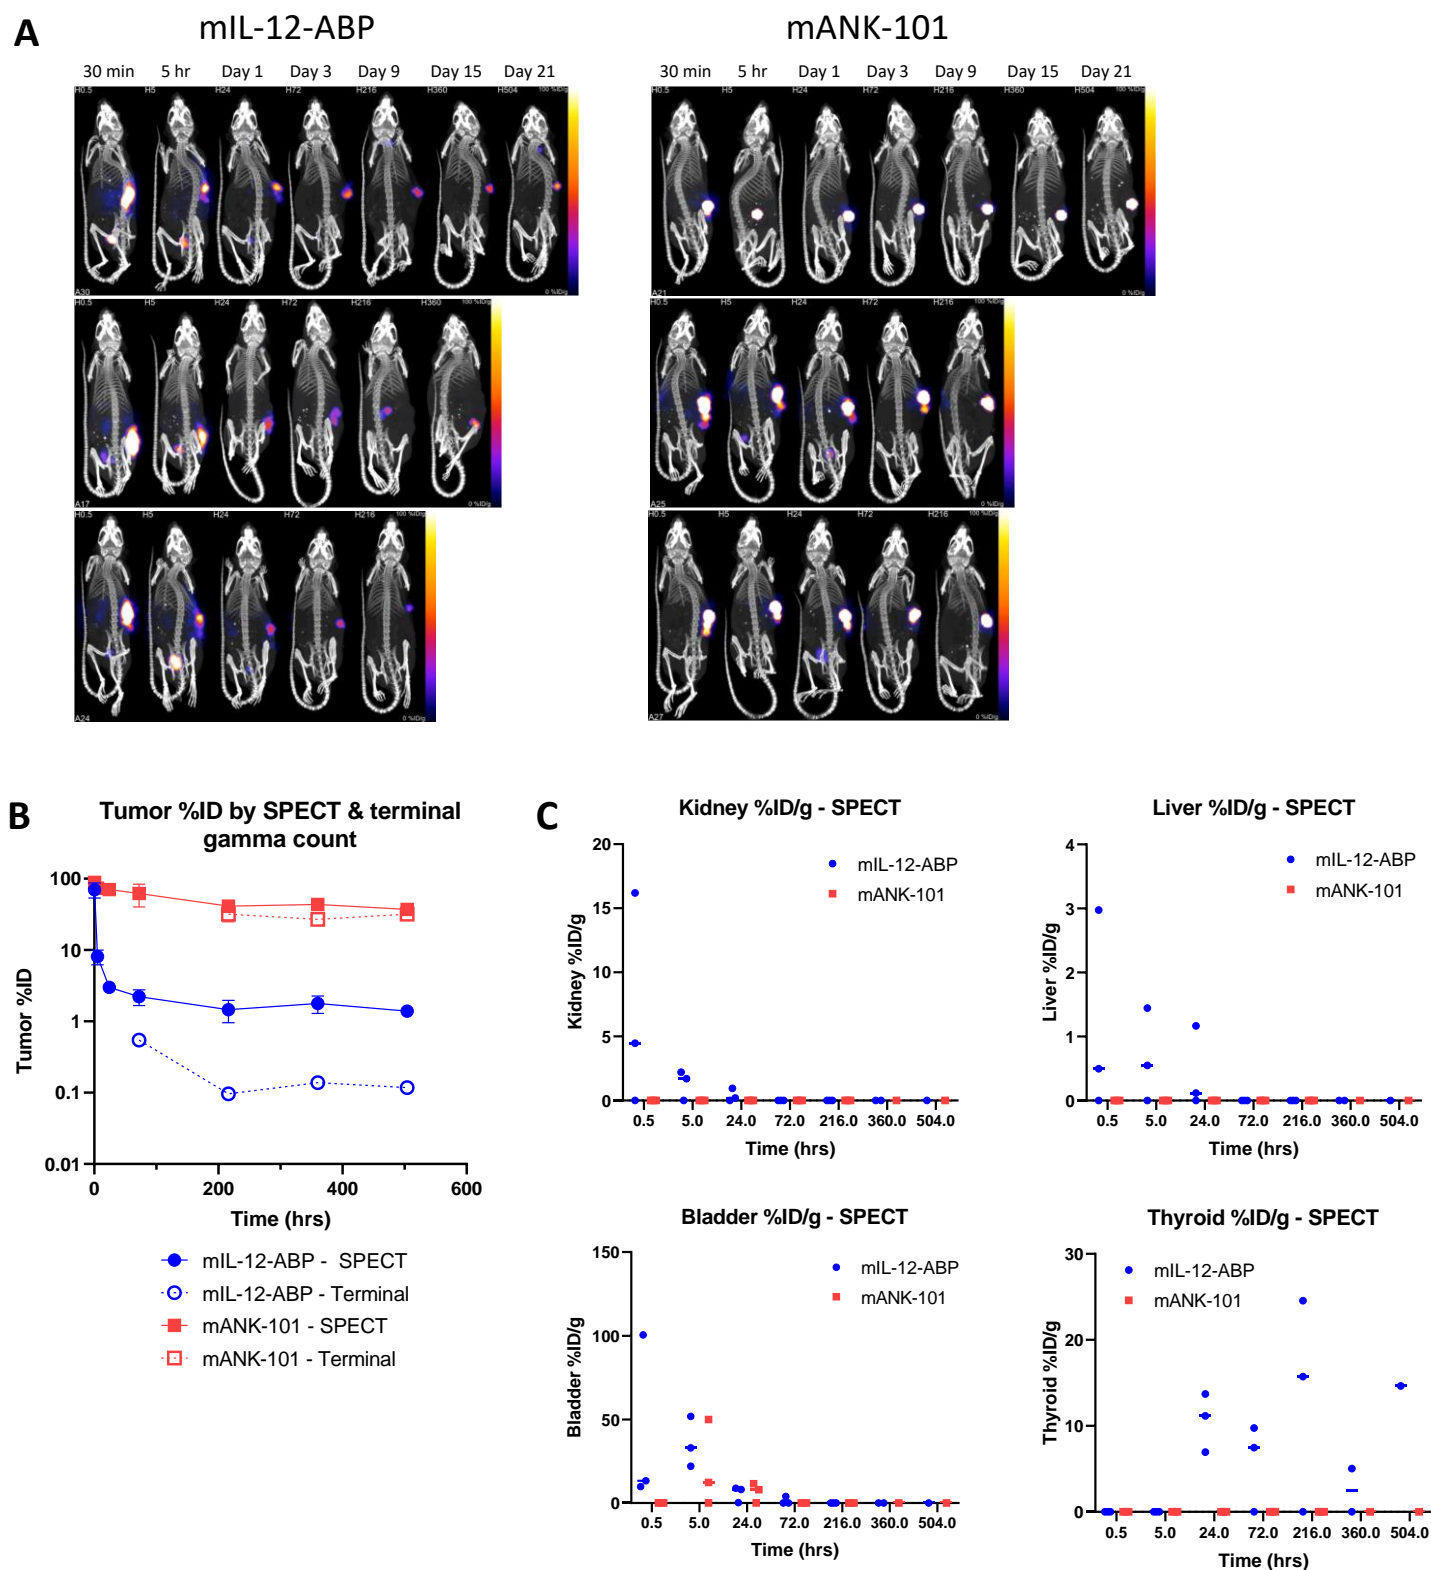

**Supplemental Figure 2. Tumor retention and tissue biodistribution of  $^{125}\text{I}$ -labeled mANK-101.** (A) SPECT/CT images of BALB/c mice bearing CT26 tumors after a single IT administration of  $^{125}\text{I}$ -labeled mIL-12-ABP as free protein or mANK-101 complex (also presented in Figure 2C). (B) Percent injected dose (%ID) in tumor of  $^{125}\text{I}$ -labeled mIL-12-ABP or mANK-101 as measured from SPECT/CT image analysis or ex vivo gamma counts. (C) Percent injected dose per gram (%ID/g) in different tissues of  $^{125}\text{I}$ -labeled mIL-12-ABP or mANK-101 as measured from SPECT/CT image analysis.

Supplemental Figure 3

A

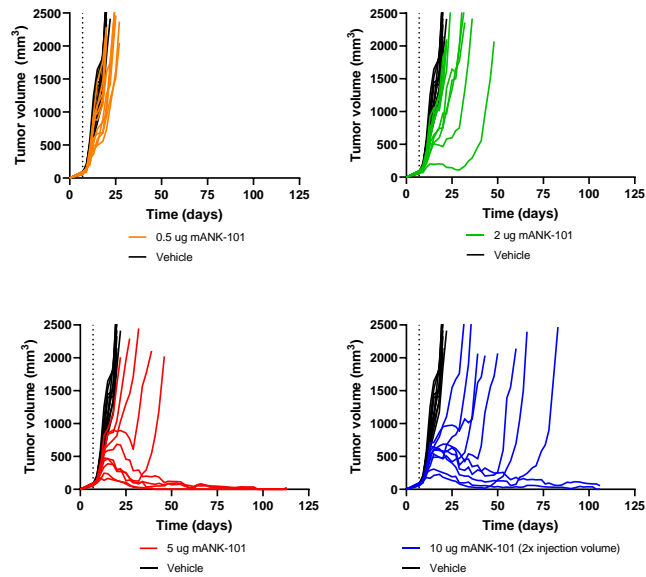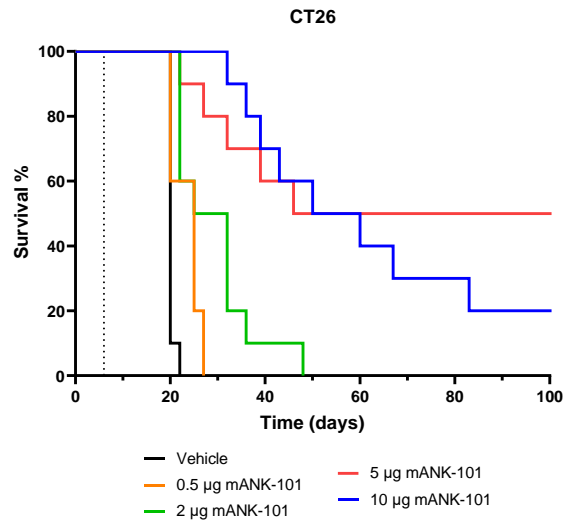

B

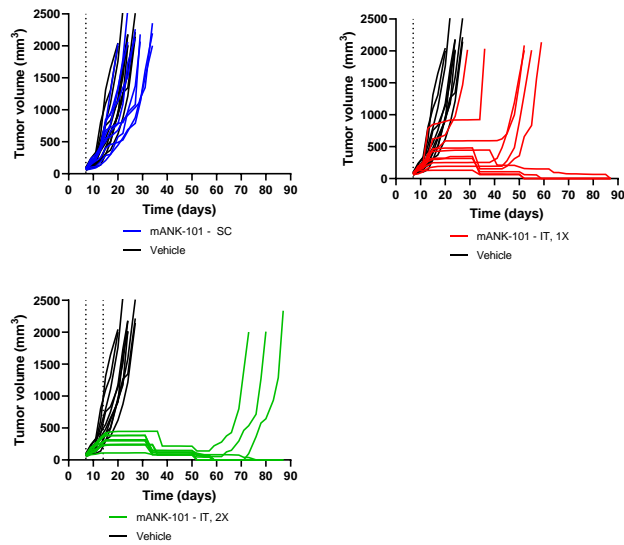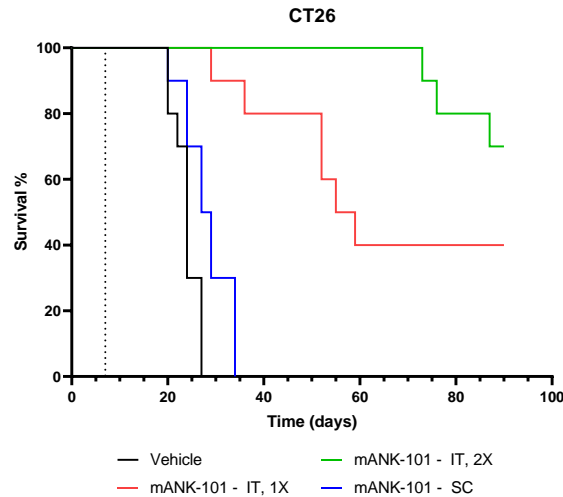

C

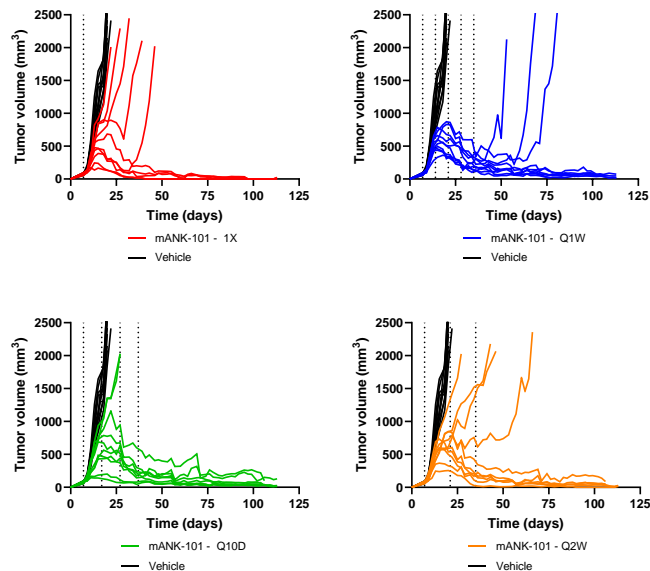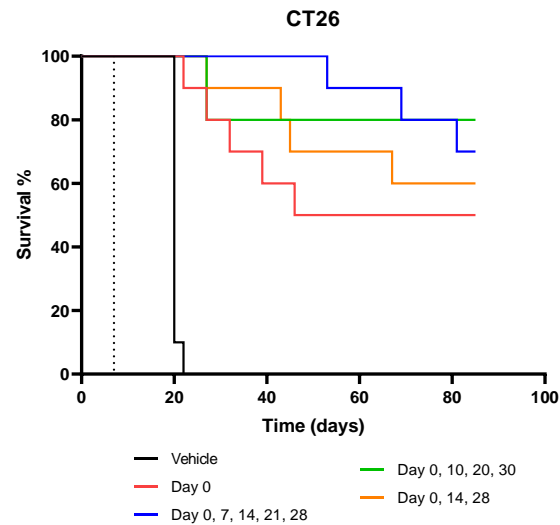

D

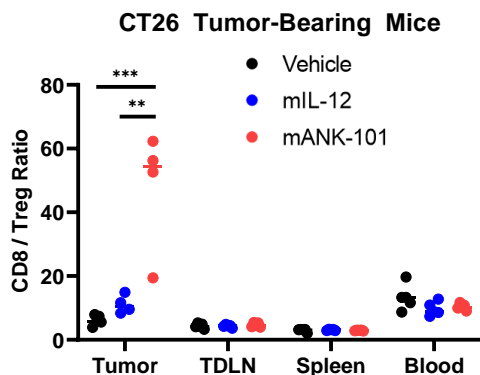

**Supplemental Figure 3. Dosing optimization of mANK-101 in CT26 tumor model.** (A) Survival curves and individual tumor volume traces from BALB/c mice ( $n = 10$ ) bearing CT26 tumors treated with a single IT injection of vehicle, 0.5, 2, 5, or 10  $\mu\text{g}$  mANK-101 complex. All injections were administered in a 20  $\mu\text{L}$  volume, except the 10  $\mu\text{g}$  group which was administered in 40  $\mu\text{L}$ . The dashed vertical line denotes the treatment day. (B) Survival curves and individual tumor volume traces from BALB/c mice ( $n = 10$ ) bearing CT26 tumors treated with 5  $\mu\text{g}$  mANK-101 complex either as a single IT injection, two IT injections 1 week apart, or a single subcutaneous injection on the opposite flank. (C) Survival curves and individual tumor volume traces from BALB/c mice ( $n = 10$ ) bearing CT26 tumors treated with 5  $\mu\text{g}$  mANK-101 complex either as a single IT injection, 3 IT injections spaced 14 days apart, 4 IT injections spaced 10 days apart, or 5 IT injections spaced 1 week apart. (D) Mice bearing CT26 tumors ( $n = 5$ ) were treated with a single IT injection of vehicle, 5  $\mu\text{g}$  mIL-12, or 5  $\mu\text{g}$  mANK-101 and tumors, tumor-draining lymph node (TDLN), spleen, and peripheral blood analyzed on Day 7 by FACS. Ratio of CD8<sup>+</sup> / Foxp3<sup>+</sup> T cells. One mouse in mIL-12 and ANK-101 groups was removed from tumor analysis due to lymph node contamination. FACS analysis of tumors, TDLN, spleen, and blood was performed on Day 7. FACS comparisons performed by one-way ANOVA with Tukey's post-test \* $P < 0.05$ , \*\* $P < 0.005$ , \*\*\* $P < 0.0005$ .

**Supplemental Figure 4**

**A**

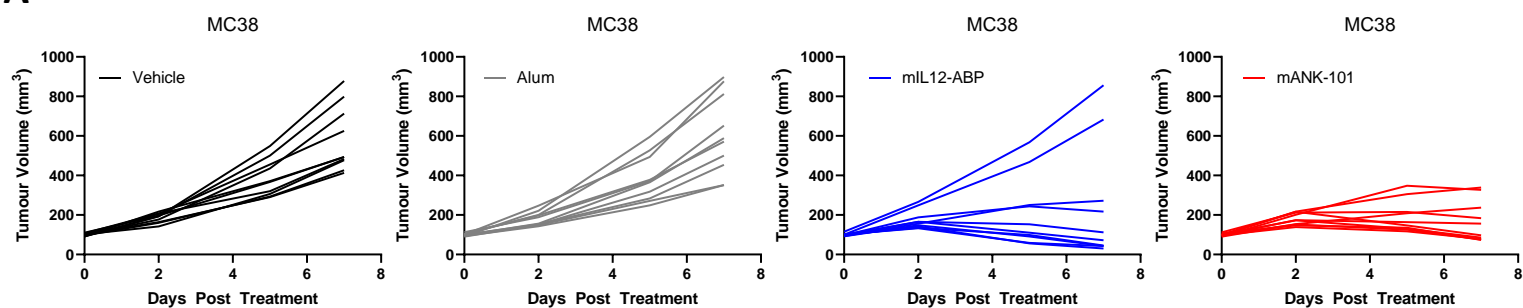

**B**

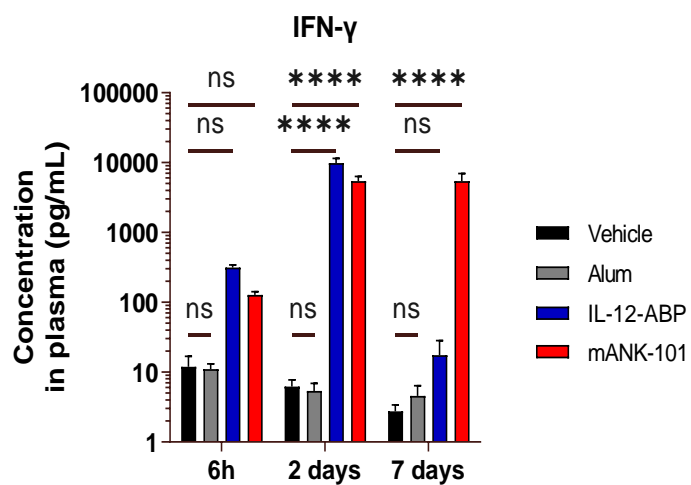

**C**

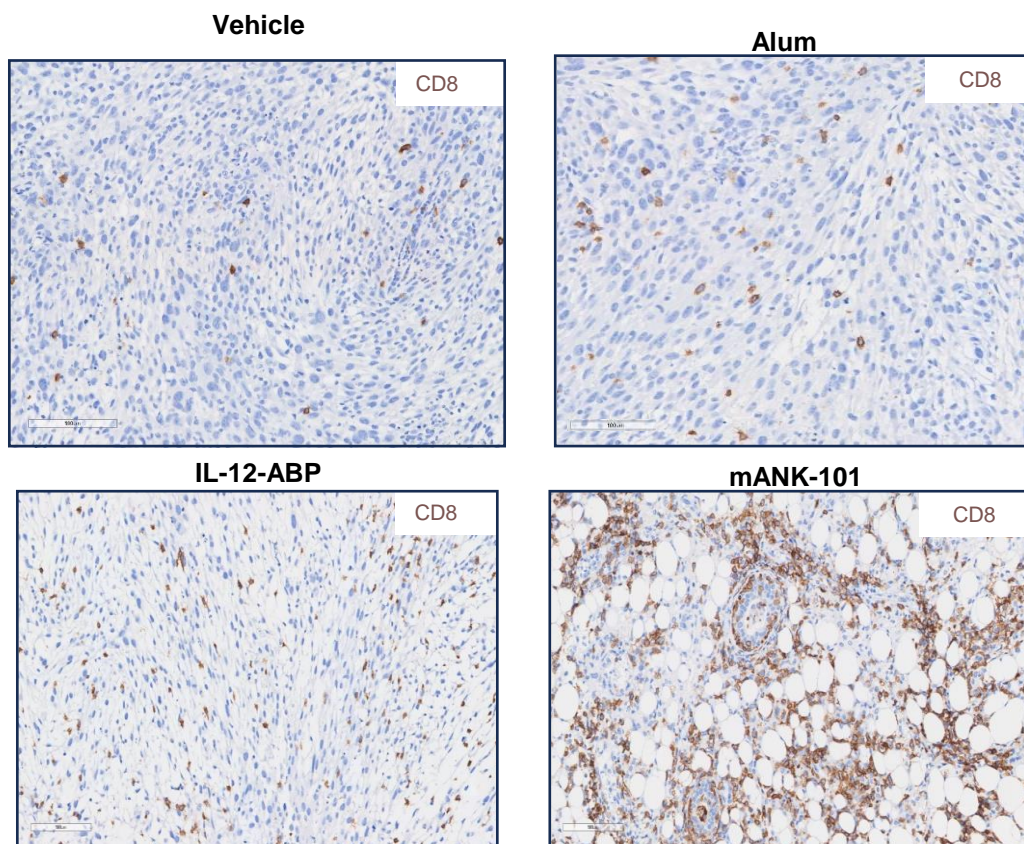

**D**

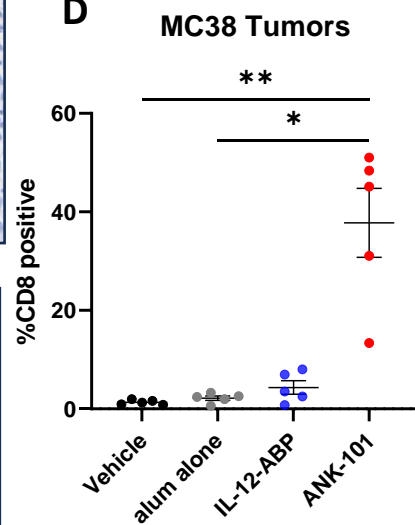

**Supplemental Figure 4. Alum does not have therapeutic or immunologic activity.** (A) Tumor growth from mice (n = 10) bearing MC38 tumors (100 mm<sup>3</sup>) were treated with a single IT injection of vehicle, IL-12-ABP alone (5μg), alum (50μg) or a combination of IL-12-ABP + alum. (B) In the same experiments, serial plasma collections were carried out for systemic IFNγ levels. (C) CD8+ T cell immunohistochemistry of MC38 tumors (n=5) following a single IT injection of vehicle or 50 μg of alum alone 7 days post-treatment. Representative images (left) with the quantification of %CD8+ T cells positives in vehicle and alum treated groups (right). IHC comparisons performed by one-way ANOVA with Tukey's post-test \*P<0.05, \*\*P<0.005.



Supplemental Figure 5

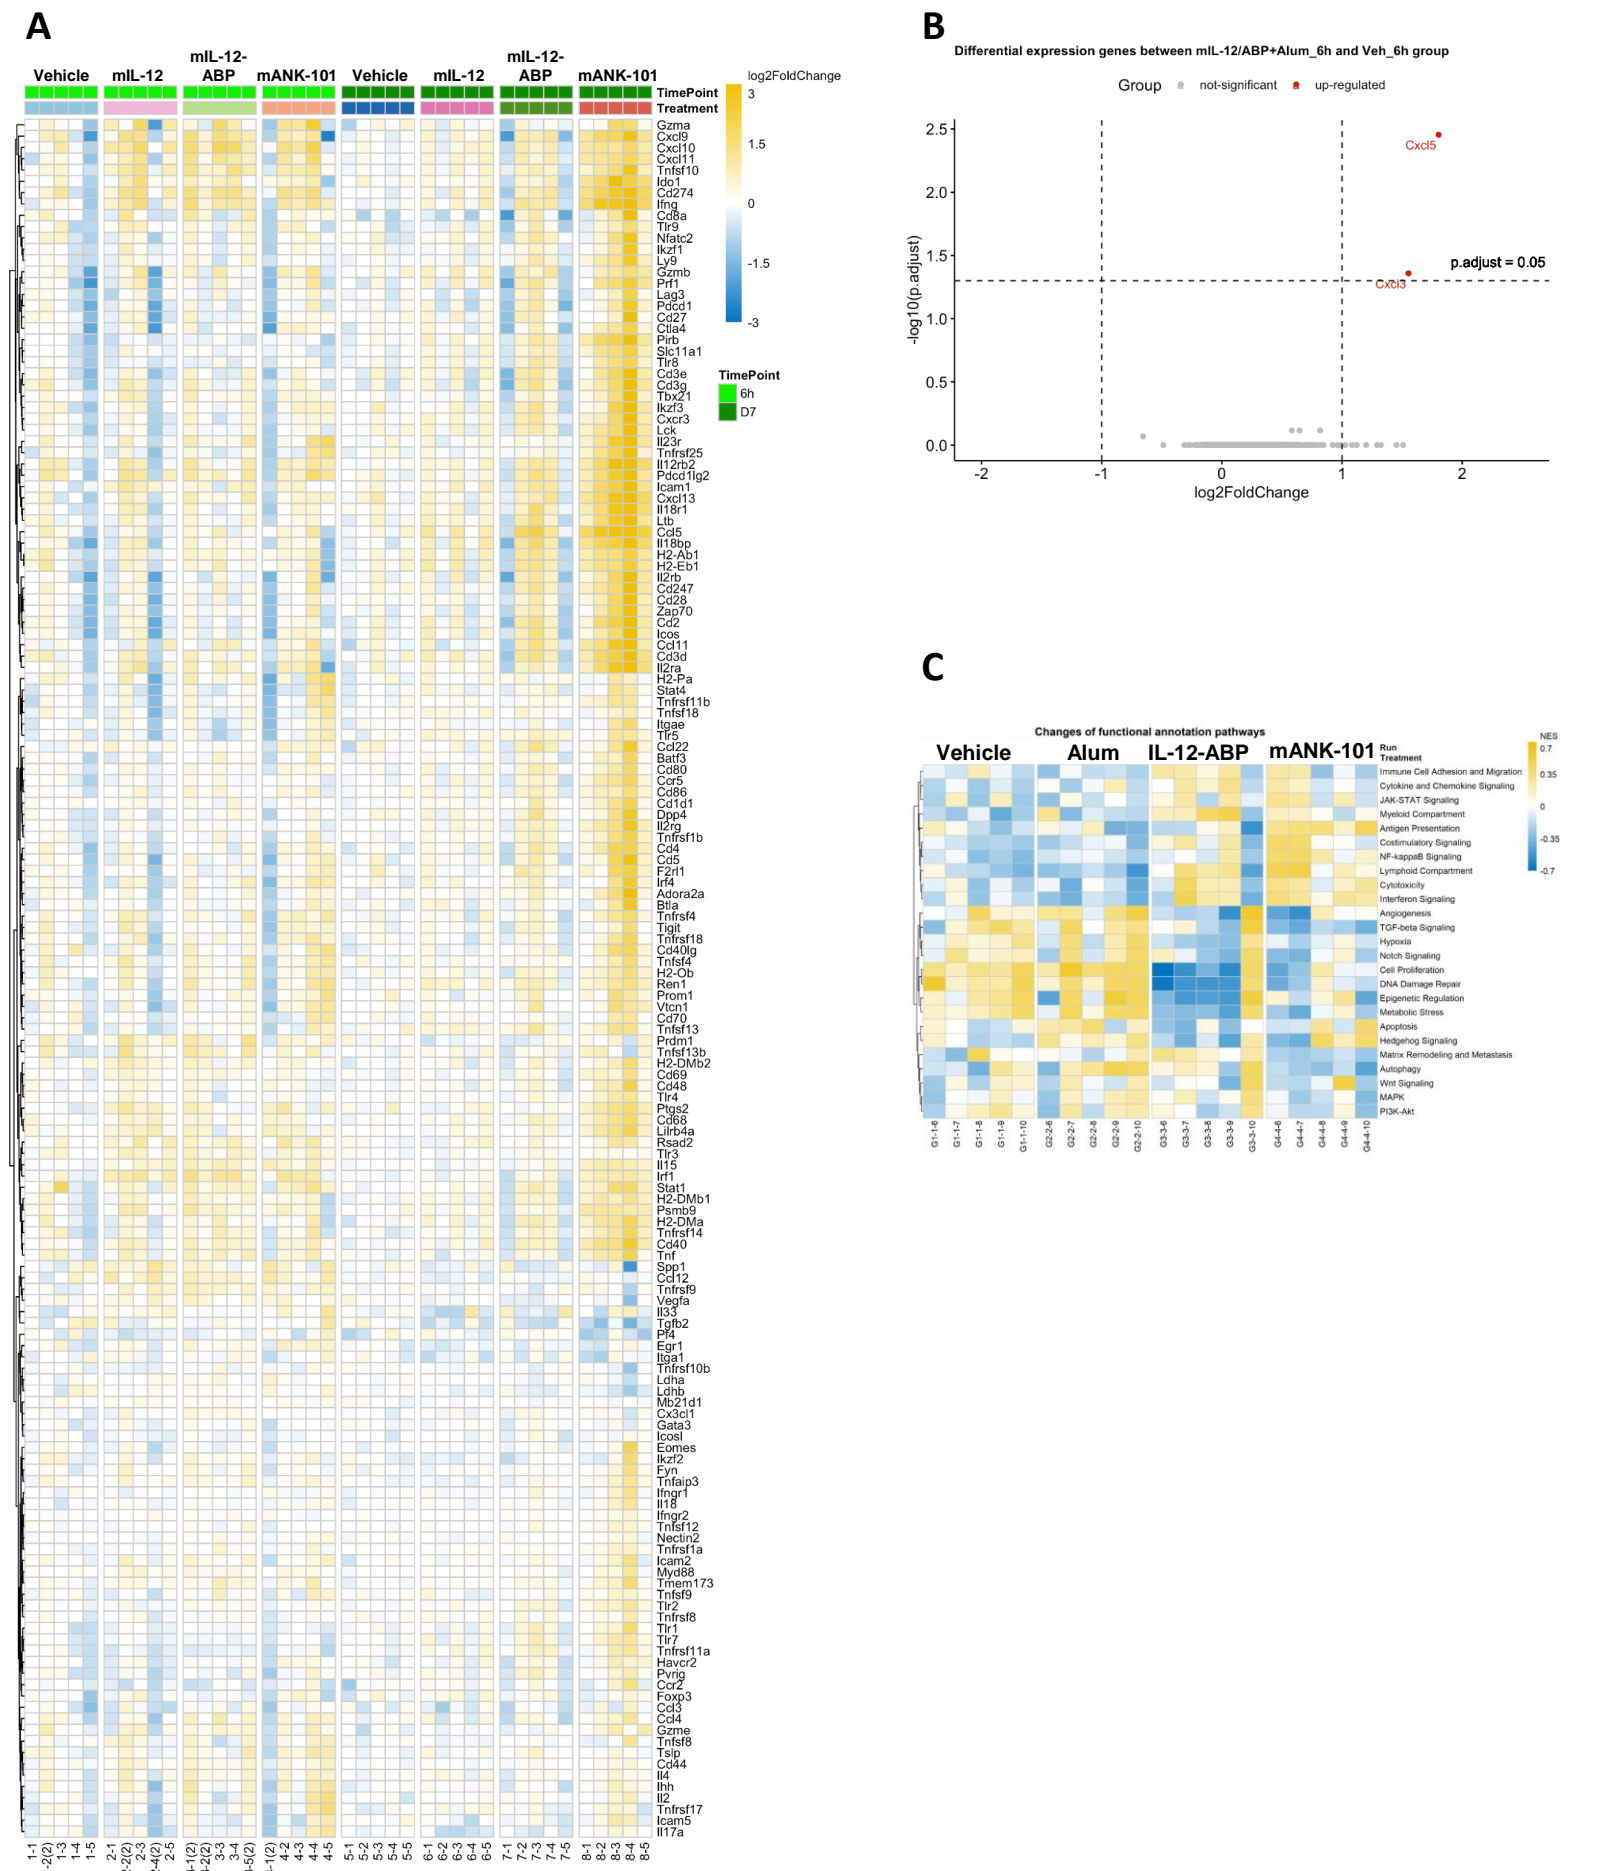

**Supplemental Figure 5. Nanostring analysis of mANK-101 induced tumor changes. (A)** Heatmap representing changes in relative expression of genes related to T cell Priming and Activation in MC38 tumors either 6 hours or 7 days after a single IT administration of vehicle, 4.6  $\mu$ g mL-12, 5  $\mu$ g free mL-12-ABP protein, or 5  $\mu$ g mANK-101 as measured with Nanostring Mouse PanCancer IO360 Panel. **(B)** Differentially expressed genes between mANK-101 and vehicle treated mice at 6 hours post-treatment. **(C)** In a separate set of experiments, alum alone control was included and intratumoral gene expression was analyzed on day 7 after treatment by Nanostring Mouse PanCancer IO360 Panel (n=5).





**Supplemental Figure 6. Changes in overall cell populations and T cell subclustering after mANK-101 treatment by scRNA-seq.** (A) UMAP plot of all cells in Vehicle or mANK-101 treated mice. Cells forming discrete clusters were manually annotated based on well-defined hematopoietic cell subset expression markers. (B) Bar graphs of the total numbers of cells (adjacent bars) or proportions (stacked bars) found in indicated hematopoietic cell subsets in vehicle-treated or mANK-101-treated mice. (C) Heatmap of transcripts most differentially expressed between each of the nine unsupervised snn clusters found in the T cell subsets. (D) Relative expression of indicated transcripts in regions of UMAP plots of T cells from vehicle or mANK-101 treated mice. Color represents relative expression.

Supplemental Figure 7

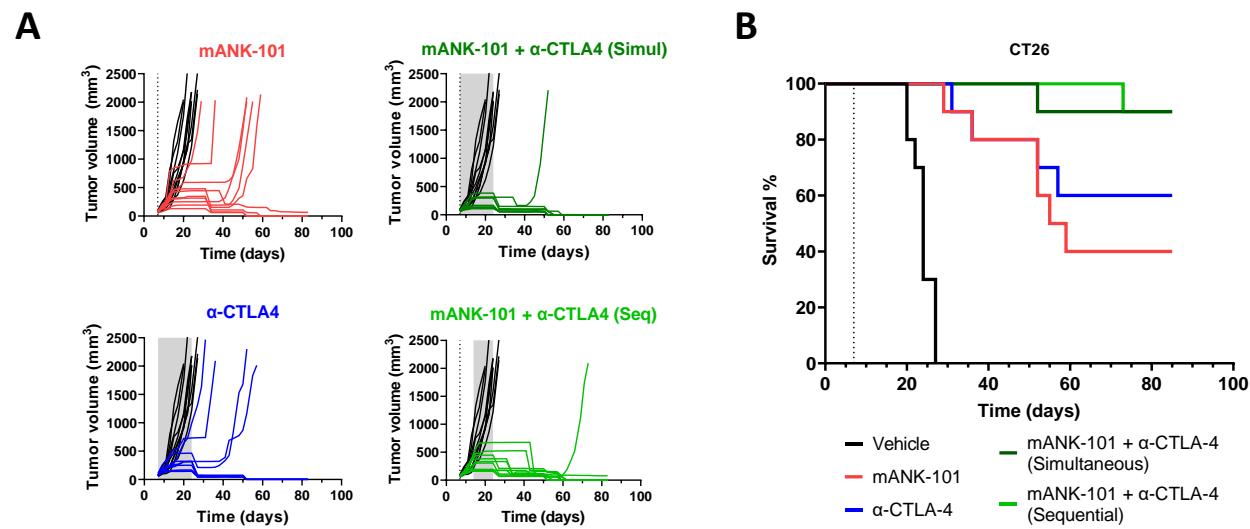

**Supplemental Figure 7. mANK-101 combination activity with CTLA-4 blockade.** Kaplan-Meier survival curves and individual tumor volume traces from BALB/c mice (n = 10) bearing CT26 tumors treated with a single IT injection of vehicle or 5 µg mANK-101 alone or in combination with anti-mouse CTLA-4 dosed at 200 µg IP biweekly for up to 3 weeks. Anti-CTLA-4 treatment started on the same day as mANK-101 administration (simultaneous) or 1 week later (sequential). The dashed vertical line denotes the mANK-101 treatment day, and the shaded grey area represents the duration of anti-CTLA-4 treatment.

Supplemental Figure 8

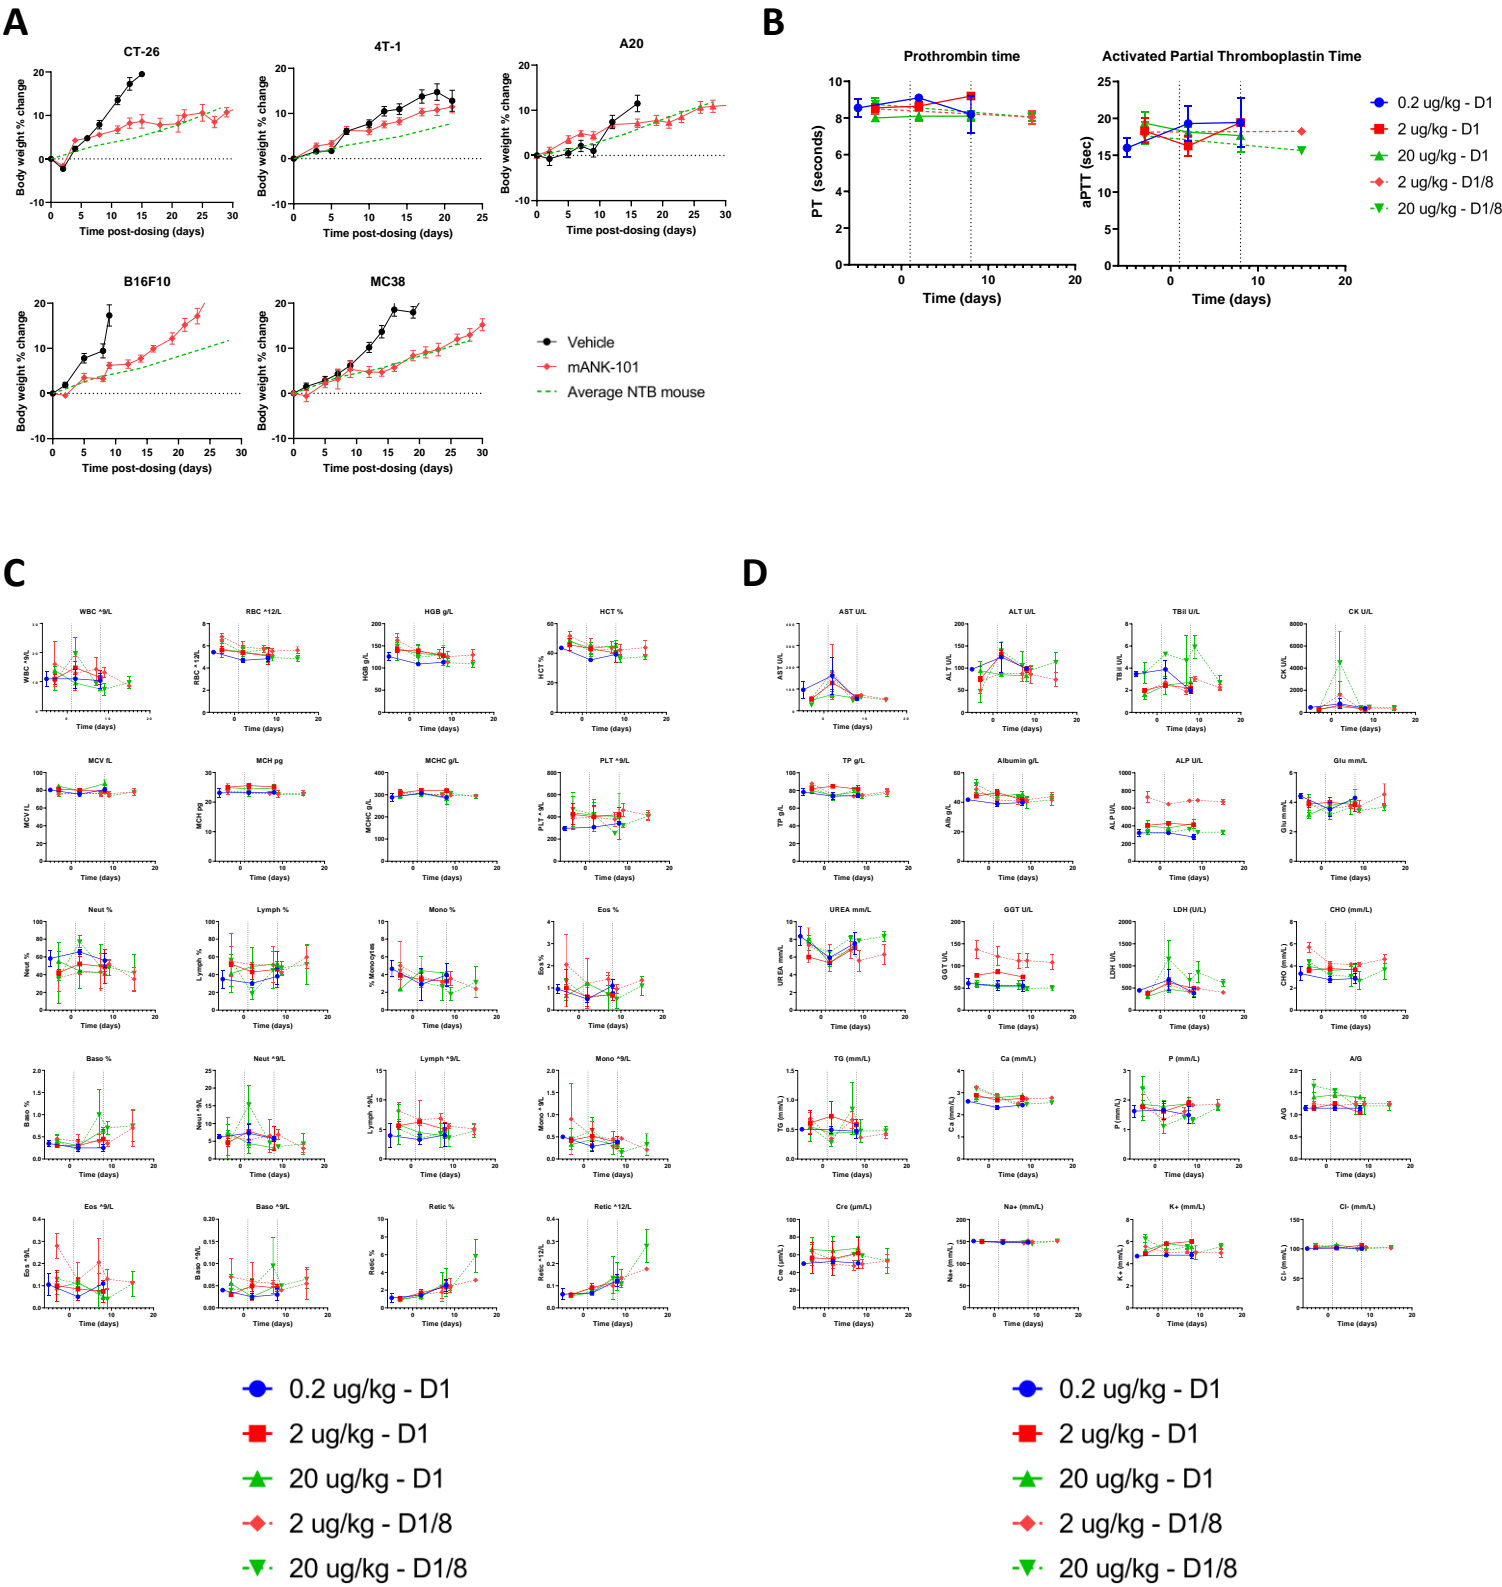

**Supplemental Figure 8. Safety profiling of ANK-101 in mice and cynomolgus macaques.** (A) Body weights of vehicle or mANK-101 treated mice in efficacy studies reported in Figure 3 compared to average growth of a non-tumor bearing (NTB) mouse. (B–D) Safety measurements from cynomolgus macaques treated with subcutaneous administration of 0.2, 2, or 20 µg/kg ANK-101 as single dose or two repeat doses 1 week apart. Vertical dashed lines represent the timing of mANK-101 administration. (B) Prothrombin time and activated partial thromboplastin time measured by solidification method (C) Hematology values measured from whole blood (D) Clinical chemistry values measured in serum.

Table S1.

| Construct  | RT (mL) | Conductivity<br>(mS/cm) |
|------------|---------|-------------------------|
| mIL-12     | 12.13   | 39.72                   |
| mIL-12-ABP | 10.86   | 32.97                   |
| hIL-12     | 11.31   | 36.49                   |
| hIL-12-ABP | 10.20   | 29.32                   |

Table S2. Serum cytokines from cynomolgus macaques treated with ANK-101

| Group                    | Animal ID | Dosing Day | Time | IFN-γ | IL-10 | IL-12p70 | IL-1β | IL-2  | IL-6  | IP-10 | TNF-α |
|--------------------------|-----------|------------|------|-------|-------|----------|-------|-------|-------|-------|-------|
| 0.2 μg/kg<br>Single dose | 22-4451   | D1         | 0h   | BQL   | BQL   | BQL      | BQL   | 0.646 | 2.20  | 130   | BQL   |
|                          |           |            | 2h   | BQL   | BQL   | BQL      | BQL   | 0.758 | 1.94  | 151   | BQL   |
|                          |           |            | 24h  | 6.61  | BQL   | 1.88     | BQL   | 1.01  | 1.48  | 298   | BQL   |
|                          |           |            | 72h  | 8.61  | BQL   | 2.79     | BQL   | 1.02  | 1.21  | 324   | BQL   |
|                          |           |            | 168h | 6.41  | BQL   | BQL      | BQL   | 0.956 | 2.45  | 138   | BQL   |
|                          | 22-4452   | D1         | 0h   | BQL   | BQL   | BQL      | BQL   | 0.602 | 3.52  | 64.8  | BQL   |
|                          |           |            | 2h   | BQL   | BQL   | BQL      | BQL   | BQL   | 3.51  | 59.1  | BQL   |
|                          |           |            | 24h  | BQL   | BQL   | BQL      | BQL   | BQL   | 3.34  | 107   | BQL   |
|                          |           |            | 72h  | BQL   | BQL   | BQL      | 2.15  | 0.838 | 12.9  | 277   | BQL   |
|                          |           |            | 168h | BQL   | BQL   | BQL      | BQL   | 0.897 | 5.80  | 252   | BQL   |
| 2 μg/kg<br>Single dose   | 22-4453   | D1         | 0h   | BQL   | BQL   | BQL      | BQL   | BQL   | 1.35  | 205   | BQL   |
|                          |           |            | 2h   | BQL   | BQL   | BQL      | BQL   | 0.530 | 3.94  | 255   | BQL   |
|                          |           |            | 24h  | BQL   | BQL   | 4.64     | BQL   | 0.702 | 5.24  | 366   | BQL   |
|                          |           |            | 72h  | BQL   | BQL   | 7.48     | BQL   | 0.570 | 2.97  | 267   | BQL   |
|                          |           |            | 168h | BQL   | BQL   | 8.58     | BQL   | 0.992 | 4.56  | 439   | BQL   |
|                          | 22-4454   | D1         | 0h   | BQL   | BQL   | BQL      | BQL   | BQL   | 1.65  | 246   | BQL   |
|                          |           |            | 2h   | BQL   | BQL   | BQL      | BQL   | BQL   | 1.85  | 285   | BQL   |
|                          |           |            | 24h  | BQL   | BQL   | BQL      | BQL   | BQL   | 1.91  | 322   | BQL   |
|                          |           |            | 72h  | BQL   | BQL   | 5.00     | BQL   | BQL   | 3.09  | 158   | BQL   |
|                          |           |            | 168h | BQL   | BQL   | 6.56     | BQL   | 0.574 | 7.11  | 479   | BQL   |
| 20 μg/kg<br>Single dose  | 22-4455   | D1         | 0h   | BQL   | BQL   | BQL      | BQL   | 0.566 | 0.894 | 356   | BQL   |
|                          |           |            | 2h   | BQL   | BQL   | BQL      | BQL   | 0.626 | 1.06  | 354   | BQL   |
|                          |           |            | 24h  | BQL   | BQL   | 4.62     | BQL   | 0.642 | 4.44  | 571   | BQL   |
|                          |           |            | 72h  | BQL   | BQL   | 11.4     | BQL   | 0.586 | 1.18  | 267   | BQL   |
|                          |           |            | 168h | BQL   | BQL   | 45.5     | BQL   | 0.964 | 3.70  | 1239  | BQL   |
|                          | 22-4456   | D1         | 0h   | BQL   | BQL   | BQL      | BQL   | 0.897 | 1.45  | 319   | BQL   |
|                          |           |            | 2h   | BQL   | BQL   | BQL      | BQL   | BQL   | 4.49  | 367   | BQL   |
|                          |           |            | 24h  | BQL   | BQL   | 6.96     | BQL   | 0.718 | 1.86  | 732   | BQL   |
|                          |           |            | 72h  | BQL   | BQL   | 12.2     | BQL   | 0.489 | 0.612 | 563   | BQL   |
|                          |           |            | 168h | BQL   | BQL   | 20.9     | BQL   | 0.972 | 2.12  | 1211  | BQL   |
| 2 μg/kg<br>Repeat dose   | 22-4457   | D1         | 0h   | BQL   | BQL   | BQL      | 1.40  | 1.90  | 1.75  | 363   | BQL   |
|                          |           |            | 2h   | BQL   | BQL   | BQL      | BQL   | 1.76  | 21.0  | 260   | BQL   |
|                          |           |            | 24h  | BQL   | BQL   | BQL      | BQL   | 1.24  | 9.85  | 351   | BQL   |
|                          |           |            | 72h  | BQL   | BQL   | 6.44     | BQL   | 1.30  | 1.88  | 347   | BQL   |
|                          |           | D8         | 0h   | BQL   | BQL   | 12.0     | BQL   | 1.10  | 1.41  | 509   | BQL   |
|                          |           |            | 2h   | BQL   | BQL   | 11.2     | BQL   | 1.09  | 2.94  | 514   | BQL   |
|                          |           |            | 24h  | BQL   | BQL   | 11.1     | BQL   | 0.913 | 2.23  | 513   | BQL   |
|                          |           |            | 72h  | BQL   | BQL   | 23.5     | BQL   | 1.27  | 2.06  | 498   | BQL   |
|                          | 22-4459   | D1         | 168h | 6.79  | BQL   | 4.24     | BQL   | 1.44  | 3.69  | 374   | BQL   |
|                          |           |            | 0h   | BQL   | BQL   | BQL      | BQL   | 1.71  | 1.29  | 423   | BQL   |
|                          |           |            | 2h   | BQL   | BQL   | BQL      | BQL   | 1.41  | 9.26  | 322   | BQL   |
|                          |           |            | 24h  | BQL   | BQL   | 4.65     | BQL   | 0.992 | 21.9  | 690   | BQL   |
|                          |           | D8         | 72h  | BQL   | BQL   | 7.68     | BQL   | 1.26  | 1.65  | 312   | BQL   |
|                          |           |            | 0h   | BQL   | BQL   | 10.4     | BQL   | 1.02  | 1.50  | 509   | BQL   |
|                          |           |            | 2h   | BQL   | BQL   | 11.3     | BQL   | 1.00  | 2.07  | 537   | BQL   |
|                          |           |            | 24h  | BQL   | BQL   | 19.4     | BQL   | 1.08  | 1.67  | 339   | BQL   |
| 20 μg/kg<br>Repeat dose  | 22-4458   | D1         | 72h  | BQL   | BQL   | 21.3     | BQL   | 1.19  | 2.84  | 489   | BQL   |
|                          |           |            | 168h | BQL   | BQL   | 9.76     | BQL   | BQL   | 1.55  | 213   | BQL   |
|                          |           |            | 0h   | BQL   | BQL   | BQL      | BQL   | 1.24  | 1.44  | 180   | BQL   |
|                          |           |            | 2h   | BQL   | BQL   | BQL      | BQL   | 1.48  | 47.6  | 198   | BQL   |
|                          |           | D8         | 24h  | BQL   | BQL   | 11.8     | BQL   | 1.16  | 7.61  | 382   | BQL   |
|                          |           |            | 72h  | 8.52  | BQL   | 59.8     | BQL   | 1.75  | 3.75  | 1303  | BQL   |
|                          |           |            | 0h   | 778   | BQL   | 32.6     | BQL   | 2.52  | 7.91  | 12631 | BQL   |
|                          |           |            | 2h   | 625   | BQL   | 29.9     | BQL   | 2.32  | 14.0  | 12763 | BQL   |
|                          | 22-4460   | D1         | 24h  | 434   | BQL   | 47.3     | 4.01  | 2.95  | 13.8  | 11244 | BQL   |
|                          |           |            | 72h  | 16.0  | BQL   | 43.7     | BQL   | 3.52  | 14.7  | 8903  | BQL   |
|                          |           |            | 168h | BQL   | BQL   | BQL      | BQL   | 4.22  | 3.41  | 467   | BQL   |

**Table S3. SPECT/CT acquisition and reconstruction parameters**

| <b>SPECT Acquisition Parameters</b>    |                                                         |
|----------------------------------------|---------------------------------------------------------|
| System                                 | NanoScan SPECT/CTTM (Mediso)                            |
| Scan range                             | Whole body                                              |
| Scan duration & time points            | 30 m, 5 h, 24 h, 72 d, 10 d, 15 d, 21 d<br>(30 minutes) |
| Energy window                          | 28.37 20%FW keV                                         |
| Number of projections                  | 360                                                     |
| Time per projection                    | 34 s                                                    |
| Pinhole aperture (# & diameter)        | Aperture #63 (1.0 mm)                                   |
| <b>SPECT Reconstruction Parameters</b> |                                                         |
| Smoothing                              | Low                                                     |
| Resolution                             | Medium                                                  |
| Iterations                             | Medium                                                  |
| Corrections                            | Attenuation and Scatter                                 |
| Voxel size                             | 1.0 × 1.0 mm                                            |

| <b>CT Acquisition Parameters</b>    |                              |
|-------------------------------------|------------------------------|
| System                              | NanoScan SPECT/CTTM (Mediso) |
| Scan range                          | Whole body                   |
| Tube voltage                        | 50 kVp                       |
| Current                             | 640 $\mu$ A                  |
| Exposure time                       | 300 ms                       |
| Number of projections               | 180                          |
| <b>CT Reconstruction Parameters</b> |                              |
| Algorithm                           | Filtered Backprojection      |
| Filter                              | Cosine                       |
| Voxel size                          | 0.250 × 0.250 mm             |

**Table S4. FACS reagents**

| Marker  | Fluorochrome | Clone       | Cat.       | Isotype                  | Vender       |
|---------|--------------|-------------|------------|--------------------------|--------------|
| CD45    | BV785        | 30-F11      | 103149     | Rat IgG2b, κ             | Biolegend    |
| CD3     | BUV395       | 17A2        | 740268     | Rat IgG2b, κ             | BD           |
| CD4     | BV421        | GK1.5       | 100438     | Rat IgG2b, κ             | Biolegend    |
| CD8     | PE-eFluor610 | 53-6.7      | 61-0081-82 | Rat IgG2a, κ             | eBiosciences |
| Foxp3   | PE           | FJK-16s     | 12-5773-82 | Rat IgG2a, κ             | eBiosciences |
| CD335   | BV711        | 29A1.4      | 137621     | Rat IgG2a, κ             | Biolegend    |
| CD11b   | BUV661       | M1/70       | 612977     | Rat IgG2b, k             | BD           |
| F4/80   | BV510        | BM8         | 123135     | Rat IgG2a, κ             | Biolegend    |
| I-A/I-E | AF700        | M5/114.15.2 | 107622     | Rat IgG2b, κ             | Biolegend    |
| Ly-6G   | BUV737       | 1A8         | 741813     | Rat IgG2a, κ             | BD           |
| Ly-6C   | FITC         | HK1.4       | 128006     | Rat IgG2c, κ             | Biolegend    |
| PD-1    | BV650        | J43         | 744546     | Armenian Hamster IgG2, κ | BD           |
| PD-L1   | Percp-cy5.5  | 10F.9G2     | 124334     | Rat IgG2b, κ             | Biolegend    |
| CD19    | BV605        | 6D5         | 115540     | Rat IgG2a, κ             | Biolegend    |
| CD86    | PE-CY7       | GL1         | 105014     | Rat IgG2a, κ             | Biolegend    |
| CD103   | APC          | 2E7         | 121414     | Armenian Hamster IgG, κ  | Biolegend    |
| L/D     | efluo780     | NA          | 65-0865-14 | NA                       | eBiosciences |



**Table S5. Genes used in Nanostring cell signatures**

| <b>Cell type</b> | <b>Probe set</b>                     |
|------------------|--------------------------------------|
| T cells          | Cd3d, Cd3e, Cd3g, Cd6, Sh2d1a, Trat1 |
| Macrophages      | Cd163, Cd68, Cd84, Ms4a4a            |
| Th1 cells        | Tbx21                                |
| NK CD56dim cells | Il21r, Klr3dl1, Klr3dl2              |

**Table S6. Hematology parameters measured in cynomolgus macaque study**

| Abbreviation | Parameter                         | Unit                   | Detection methods                                                                                                     |
|--------------|-----------------------------------|------------------------|-----------------------------------------------------------------------------------------------------------------------|
| WBC          | Total leukocyte count             | $\times 10^9/L$        | The Basophil / Nuclear Lobularity Analysis Method+ Two-dimensional laser flow technology + Peroxidase staining method |
| Neut         | Neutrophilic granulocyte          | $\times 10^9/L$ , %    | Peroxidase staining method + The Basophil / Nuclear Lobularity Analysis Method                                        |
| Lymph        | Lymphocyte                        | $\times 10^9/L$ , %    | Peroxidase staining method + The Basophil / Nuclear Lobularity Analysis Method                                        |
| Mono         | Mononuclear cell                  | $\times 10^9/L$ , %    | Peroxidase staining method + The Basophil / Nuclear Lobularity Analysis Method                                        |
| Eos          | Eosinophils                       | $\times 10^9/L$ , %    | Peroxidase staining method + The Basophil / Nuclear Lobularity Analysis Method                                        |
| Baso         | Basophilic cell                   | $\times 10^9/L$ , %    | Peroxidase staining method + The Basophil / Nuclear Lobularity Analysis Method                                        |
| RBC          | Erythrocyte count                 | $\times 10^{12}/L$     | Two-dimensional laser flow technology                                                                                 |
| HGB          | Hemoglobin                        | g/L                    | Total Hgb measured by cyanmethemoglobin                                                                               |
| HCT          | Hematocrit                        | %                      | Calculation based on RBC and MCV                                                                                      |
| Retic        | Reticulocyte count                | $\times 10^{12}/L$ , % | Two-dimensional laser flow technology+ Fluorescent staining of nucleic acids                                          |
| MCV          | Mean corpuscular volume           | fL                     | calculation                                                                                                           |
| MCHC         | Mean corpuscular hemoglobin conc. | g/L                    | calculation                                                                                                           |
| MCH          | Mean corpuscular hemoglobin       | pg                     | calculation                                                                                                           |
| PLT          | Platelet                          | $\times 10^9/L$        | Two-dimensional laser flow technology                                                                                 |

**Table S7. Clinical chemistry parameters measured in cynomolgus macaque study**

| Abbreviation    | Parameter                  | Unit   | Detection methods                         |
|-----------------|----------------------------|--------|-------------------------------------------|
| ALT             | Alanine aminotransferase   | U/L    | Alanine substrate method                  |
| AST             | Aspartate aminotransferase | U/L    | Aspartic acid substrate method            |
| TP              | Total protein              | g/L    | Biuret colorimetry                        |
| Alb             | Albumin                    | g/L    | Bromocresol green method                  |
| A/G             | Albumin/ globulin ratio    | -      | Calculated                                |
| TBil            | Total bilirubin            | μmol/L | Chemical oxidation                        |
| LDH             | Lactate dehydrogenase      | U/L    | Lactic acid substrate method              |
| ALP             | Alkaline phosphatase       | U/L    | Kinetic method with NPP-AMP               |
| CK              | Creatine kinase            | U/L    | Creatine phosphocreatine substrate method |
| GGT             | γ-glutamyl transpeptidase  | U/L    | GCANA substrate method                    |
| UREA            | Urea                       | mmol/L | Urease glutamic dehydrogenase method      |
| Cre             | Creatinine                 | μmol/L | <u>Sarcosine oxidase</u> method           |
| CHO             | Total cholesterol          | mmol/L | CHOD-PAP method                           |
| TG              | Triglycerides              | mmol/L | GPO-PAP method                            |
| Glu             | Glucose                    | mmol/L | Hexokinase method                         |
| Ca              | Calcium                    | mmol/L | Arsenazo III method                       |
| P               | Phosphorus                 | mmol/L | Ultraviolet method                        |
| Na <sup>+</sup> | Sodium ion                 | mmol/L | Electrode method                          |
| K <sup>+</sup>  | Potassium ion              | mmol/L | Electrode method                          |
| Cl <sup>-</sup> | Chloride ion               | mmol/L | Electrode method                          |
